# Supplementary material
Source: publisher figshare collection journal article supplement (https://acs.figshare.com/ndownloader/files/3925735)
Supplement: Supplementary file 1 [file 3925735]

## **Supporting Information for:**

# **Defect chemistry and vacancy concentration of luminescent europium doped ceria nanoparticles by solvothermal method**

Atul V. Thorat,<sup>a,b,c</sup> Tandra Ghoshal,<sup>a,b,c</sup> Patrick Carolan,<sup>b</sup> Justin D. Holmes,<sup>a,b,c</sup> and Michael  
A. Morris<sup>\*,a,b,c</sup>

<sup>a</sup> Materials research group, Department of Chemistry, University College Cork, Cork, Ireland

<sup>b</sup> Tyndall National Institute, University College Cork, Cork, Ireland

<sup>c</sup> Centre for Research on Adaptive Nanostructures and Nanodevices (CRANN), Trinity  
College Dublin, Dublin, Ireland

[\*] Corresponding Author: Prof. Michael A. Morris

E-mail: m.morris@ucc.ie

Tel: + 353 21 490 2180

Fax: +353 21 427 4097

**Total external reflection X-ray fluorescence (TXRF):** TXRF was used to confirm the metal cation ratio of the synthesised powdered ceria.

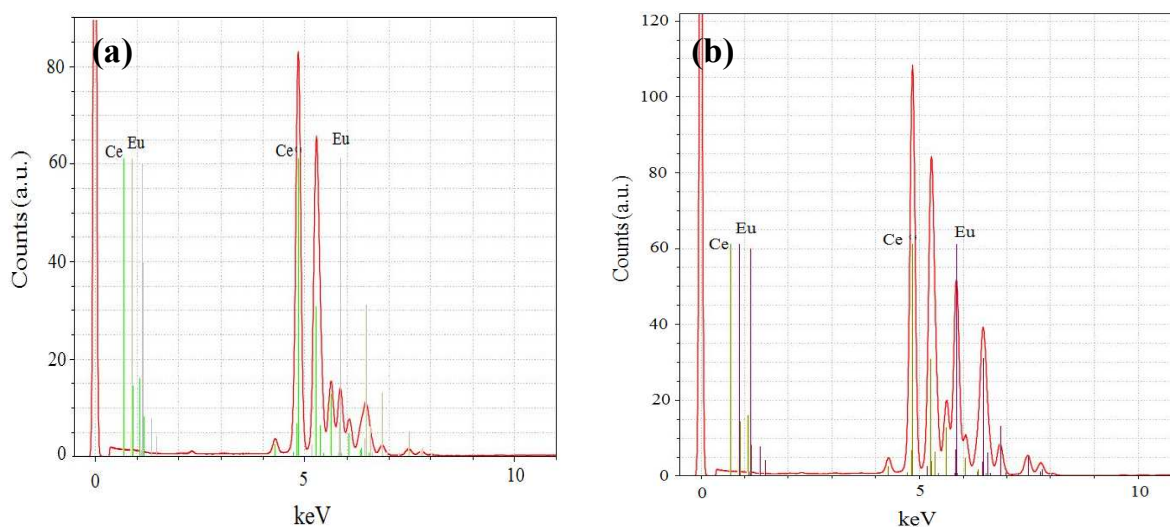

**Figure S-1.** Typical TXRF graphs of europium doped ceria nanoparticles showing line positions. (a) CEEU7.6 (b) CEEU19.6

#### **Particle size distribution of undoped and doped ceria nanoparticles:**

Figure S-2 shows the particle size distribution for the undoped, 0.8 % and 13.9 % Eu doped ceria samples calculated from TEM images. The plot shows  $\pm 0.4$  nm disparity in the particles sizes.

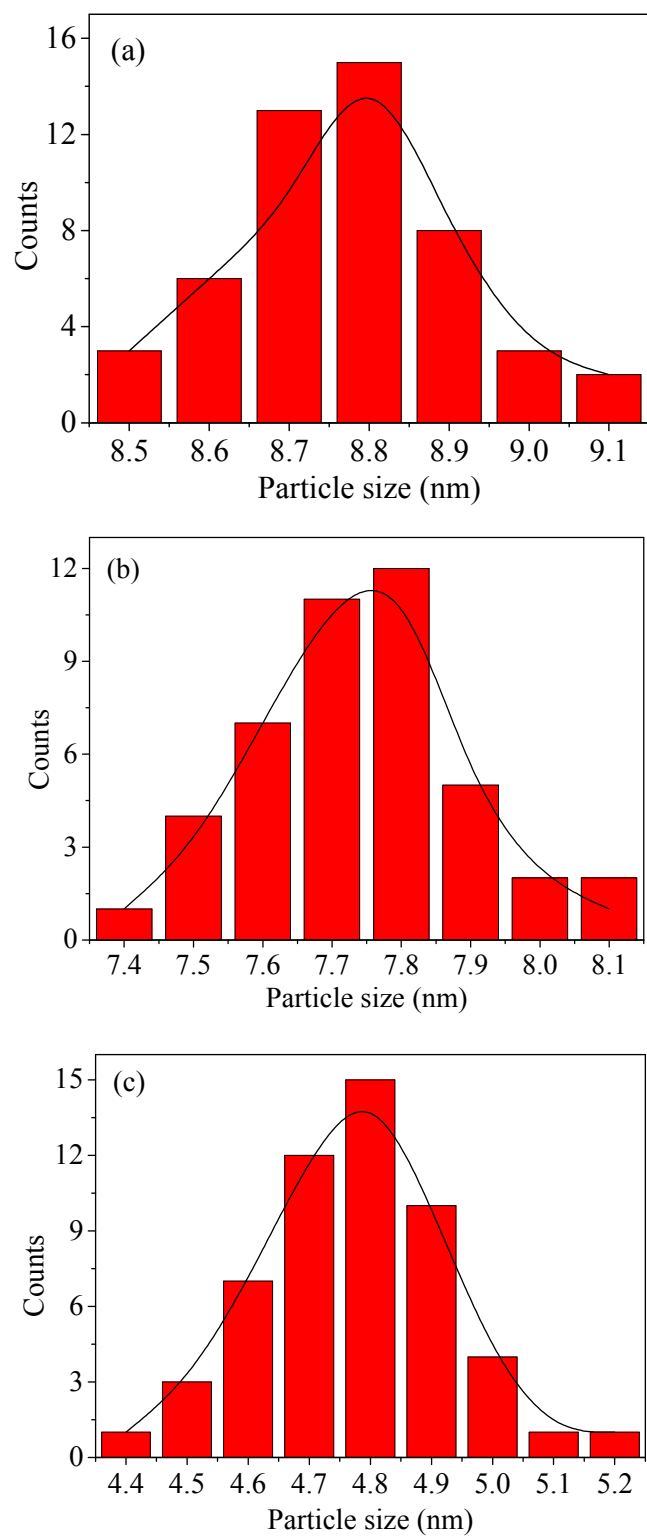

**Figure S-2.** Particle size distribution of (a) undoped (b) 0.8 % Eu doped (c) 13.9 % Eu doped ceria samples.

### EDAX mapping by STEM:

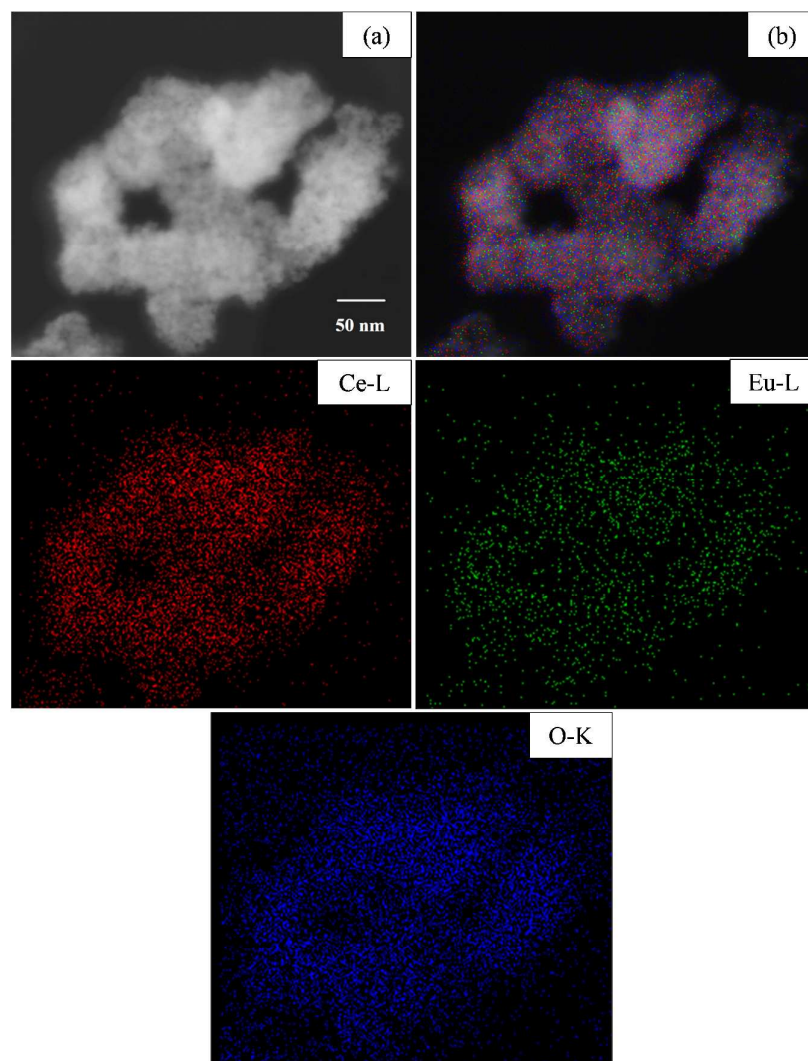

**Figure S-3.** Ce-L, Eu-L, O-K mapping of ceria cluster of CEEU7.6 by STEM. (a) aberration-corrected STEM image of ceria cluster (b) superimposed display of the elemental mapping on ceria cluster.

The large scale mapping on ceria samples was taken by scanning transmission electron microscopy (STEM) to demonstrate the distribution of doped Europium in ceria nanoparticles. Figure S-3 shows the aberration-corrected STEM image, Ce-L, Eu-L, O-K elemental mapping of ceria cluster of CEEU7.6 sample. The elemental maps exhibit the

presence of Eu, Ce and O throughout the cluster. This result indicates that the europium is uniformly distributed in ceria and not present as a free species within the powdered sample.
